# Supplementary material
Source: PubMed Central journal article supplement (PMC2651287)
Supplement: 0808933106_0808933106SI.pdf [file 0808933106_0808933106SI.pdf]

# Supporting Information

Newell *et al.* 10.1073/pnas.0808933106

## SI Text

**Construction of pLapD and Variants.** The *lapD* gene, including the preceding 24 bp, was cloned into pMQ72 downstream of the P<sub>BAD</sub> promoter. A histidine-tagged version was cloned in the same manner, with the addition of 6 codons (CAT) before the stop codon. All site-directed mutations to *lapD* were cloned in yeast using the same vector (pMQ72) and technique: *lapD* was amplified in 2 pieces, the 5' fragment ending just upstream of the codon to be changed and the 3' fragment beginning just downstream. The new codon and 21 complementary bases were added to each internal primer so that recombination in yeast would yield a single amino acid change in the translated *lapD* ORF. Deletions of *lapD* were constructed in a similar way, with fragments flanking the sequence to be deleted and primers containing 25–30 bases complementary to the adjacent fragment in the completed construct.

**Diguanylate Cyclase and Phosphodiesterase Activity Assays.** *E. coli* strains expressing the DGC PleD and the PDE CC3396 were obtained from Urs Jenal, and these proteins were purified as described (1, 2). In vitro activity assays were conducted as described by (3) and modified by (4) with the addition of 1% Triton X-100 to the reaction buffer and an incubation time of 5 h at room temperature. Reactions were stopped with the addition of 10  $\mu$ l 0.5 M EDTA and an equal volume of running buffer (1:1.5 saturated NH<sub>4</sub>SO<sub>4</sub> and 1.5 M KH<sub>2</sub>PO<sub>4</sub>), and then were resolved by TLC. Results were visualized using a phosphor storage screen (Fig. S1, C and D), as previously described (4).

**Construction of Strains for Testing LapD Responsiveness to DGC Overexpression.** DGC overexpression experiments were not performed on in a  $\Delta$ *lapD* background because of plasmid incompatibility between our DGC construct and pMQ72 and derivatives (the plasmids used in  $\Delta$ *lapD* complementation assays). Instead, LapD alleles (WT, K446A, and E203K) were reintroduced into the native LapD locus of the  $\Delta$ *lapD* mutant by single-crossover integration; then the DGC PA1107 was overexpressed from pMQ72 in these genetic backgrounds.

Construction of a Kanamycin (Kan)-marked integration vector: pMQ87 (5) was modified by (i) excision of the Gentamycin resistance gene with BsrGI and SacII, (ii) end filling by Klenow DNA polymerase (New England Biolabs), and (iii) ligation to a blunt SacI, NheI fragment of pHRB2 containing the Kan resistance gene, generating pDN2.

Construction of *lapD* integration constructs: each *lapD* allele of interest was excised from the corresponding pMQ72-based complementation plasmid with XmnI and KpnI, leaving 48 bp of homologous sequence to pDN2 at the 3' end. Additionally, a PCR fragment containing the 756 bp immediately upstream of *lapD* was amplified from genomic DNA using primers tagged with 30 bp of sequence homologous to pDN2 on the 5' end and the *lapD* reading frame on the 3' end (dubbed "*lapD* upstream"). Each *lapD* restriction fragment was mixed with the *lapD* upstream amplicon and SmaI-digested pDN2 and was used to transform yeast to generate recombinant plasmids by in vivo cloning. The resultant constructs are suicide vectors in *Pseudomonas* that are Kan marked and contain *lapD* with 756 bp of chromosomal sequence upstream to target the *lapD* locus for integration.

Construction of  $\Delta$ *lapD::lapD*, and  $\Delta$ *lapD::K446A* strains: the pDN2-*lapD* construct and derivatives were introduced to the  $\Delta$ *lapD* mutant by conjugation. Integration of these *lapD* alleles into the

native *lapD* locus was confirmed by PCR and phenotypic analysis;  $\Delta$ *lapD::lapD* forms biofilms comparable to those of WT (data not shown). Plasmids containing the DGC PA1107 (and vector controls) were introduced into these strains by electroporation.

**Non-Linear Regression Analysis of c-di-GMP-Binding Data.** To estimate the  $K_d$  of LapD for c-di-GMP, filter-binding assay data were subjected to a non-linear regression analysis (Kaleidograph, Synergy Software). Non-specific binding (the average binding by the  $\Delta$ PDE protein at a given concentration of c-di-GMP,  $n = 3$ ) was subtracted from each of 3 data sets for LapD binding to yield specific binding data for each data set. The adjusted data were plotted as the amount of c-di-GMP bound versus the  $\log_{10}$ [c-di-GMP]. The sigmoidal curve of best fit (Fig. S2) and  $K_d$  were determined as described by Cushing *et al.* (6). Several additional quantitative binding assays were applied to obtain an independent estimate. However, UV crosslinking of c-di-GMP and protein, or filter-binding assays using purified LapD, reproduced data for our control (PleD) but failed to show binding for LapD comparable to our other assays (data not shown). It is possible that structural support of the Ni-silica resin or the membrane is required for LapD's in vitro activity.

**Ponceau S Staining of Quantitative LapA Dot Blots.** To control for any differences in the retention of cells on the nitrocellulose membrane during dot blotting, a representative blot membrane was stained for total protein using Ponceau S (Sigma). Samples were spotted onto nitrocellulose, and the membrane was washed as was done for blotting. After washing, the membrane was rinsed and stained in Ponceau S solution according to the manufacturer's instructions. The stained membrane appears in Fig. S3B.

**Confirmation of the Topology of LapD in the Inner Membrane.** After the method of Manoil *et al.* (7), 4 translational fusions were constructed so that *lacZ* or *phoA* was fused to *lapD* after each of the 2 predicted transmembrane helices (amino acid positions 31 and 176, respectively). We assessed the stability and activity of these constructs by enzymatic assays (Fig. S4) and Western blotting (data not shown).  $\beta$ -galactosidase ( $\beta$ -gal) and alkaline phosphatase assays were performed as previously described (8, 9).  $\beta$ -gal activity was assessed through cleavage of the chromogenic substrate o-nitrophenyl- $\beta$ -galactoside. Phosphatase activity was assessed through cleavage of the fluorogenic substrate methyl-umberriferyl phosphate.

**Assessing in Vivo Stability of LapD and Variants.** All variants of LapD used in this study were constructed with and without histidine tags and were found to have identical complementation phenotypes with and without the tag (data not shown). To determine the stability of these proteins, the following regimen was applied to the *lapD* mutant carrying each histidine-tagged variant. Strains were grown as if for a LapA localization assay (described in *Materials and Methods*). After 6 h incubation in K10T-1, cells were harvested and lysed in 750  $\mu$ l of buffer (75 mM Tris pH 8, 150 mM NaCl, and 10 mM MgCl). After lysis, cell debris was pelleted by centrifugation (15 min at 13,000  $\times$  g). Membranes were purified from the clarified lysate by ultracentrifugation (1 h at 100,000  $\times$  g, 4  $^{\circ}$ C) and resuspended in fresh buffer. Western blotting was performed on membrane preparations, and densitometry was used to determine protein stability

relative to LapD6H, as described previously (4). Stability data are listed in Table S1.

**Construction of Strains with an Inducible *rapA* Gene.** The *rapA* gene (Pfl01\_1678) was amplified with primers containing BamHI and Acc65I restriction sites. This product and pSRK- $K_m$  were digested with the appropriate enzymes, and the resulting frag-

ments were ligated to yield a plasmid in which *rapA* is under the control of LacI (10). A fragment containing *lacI*-Plac-*rapA* was excised from the resulting plasmid with NheI and EcoRI and was subcloned into SpeI-EcoRI-digested pHRB2, within the Tn7 integration cassette. This plasmid (pHRB2-SRK-*rapA*) was used to introduce the Tn7 cassette into the chromosome as described (4).

1. Christen B, et al. (2006) Allosteric control of cyclic di-GMP signaling. *J Biol Chem* 281(42):32015–32024.
2. Christen M, Christen B, Folcher M, Schauerte A, Jenal U (2005) Identification and characterization of a cyclic di-GMP specific phosphodiesterase and its allosteric control by GTP. *J Biol Chem* 280(35):30829–30837.
3. Paul R, et al. (2004) Cell cycle-dependent dynamic localization of a bacterial response regulator with a novel di-guanylate cyclase output domain. *Genes Dev* 18(6):715–727.
4. Monds RD, Newell PD, Gross RH, O'Toole GA (2007) Phosphate-dependent modulation of c-di-GMP levels regulates *Pseudomonas fluorescens* Pf0–1 biofilm formation by controlling secretion of the adhesin LapA. *Mol Microbiol* 63(3):659–679.
5. Shanks RMQ, Caiazza NC, Hinsa SM, Toutain CM, O'Toole GA (2006) A yeast-based molecular tool kit for manipulation of gram-negative bacterial genes. *Appl Environ Microbiol* 72(7):5027–5036.
6. Cushing PR, Fellows A, Villone D, Boisguerin P, Madden DR (2008) The relative binding affinities of PDZ partners for CFTR: A biochemical basis for efficient endocytic recycling. *Biochemistry* 47(38):10084–10098.
7. Manoil C, Beckwith J (1986) A genetic approach to analyzing membrane protein topology. *Science* 233:1403–1408.
8. Miller JH (1992) *A Short Course in Bacterial Genetics* (Cold Spring Harbor Press, Cold Spring Harbor, NY).
9. Monds RD, Newell PD, Schwartzman JA, O'Toole GA (2006) Conservation of the Pho regulon in *Pseudomonas fluorescens* Pf0–1. *Appl Environ Microbiol* 72(3):1910–1924.
10. Khan SR, Gaines J, Roop RM II, Farrand SK (2008) Broad-host-range expression vectors with tightly regulated promoters and their use to examine the influence of TraR and TraM expression on Ti plasmid quorum sensing. *Appl Environ Microbiol* 74(16):5053–5062.



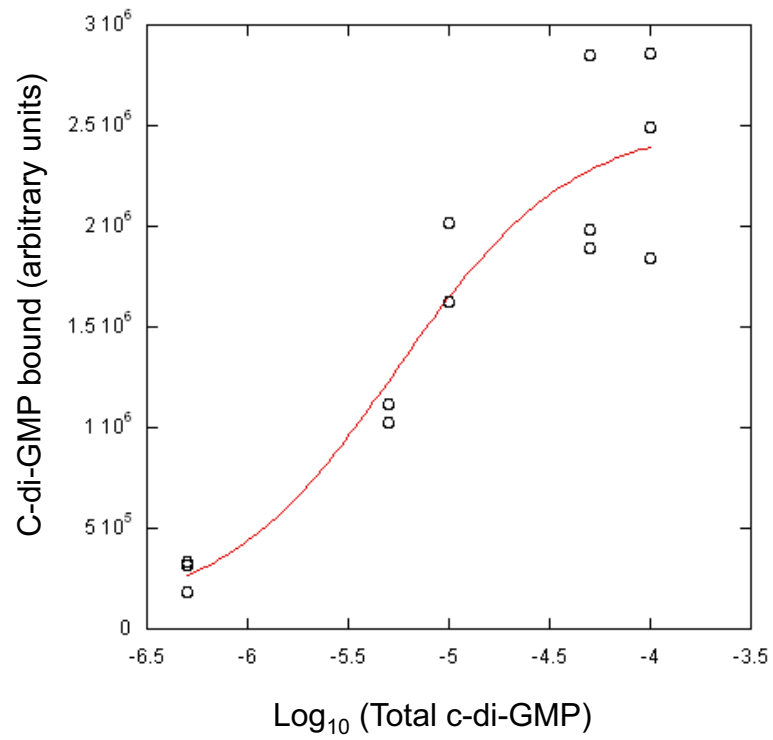

**Fig. S2.** Non-linear regression of specific binding of c-di-GMP by LapD in filter-binding assays. The amount of radiolabeled c-di-GMP bound by LapD-containing membranes in 3 independent assays is plotted against  $\log_{10}$  of the concentration of c-di-GMP.



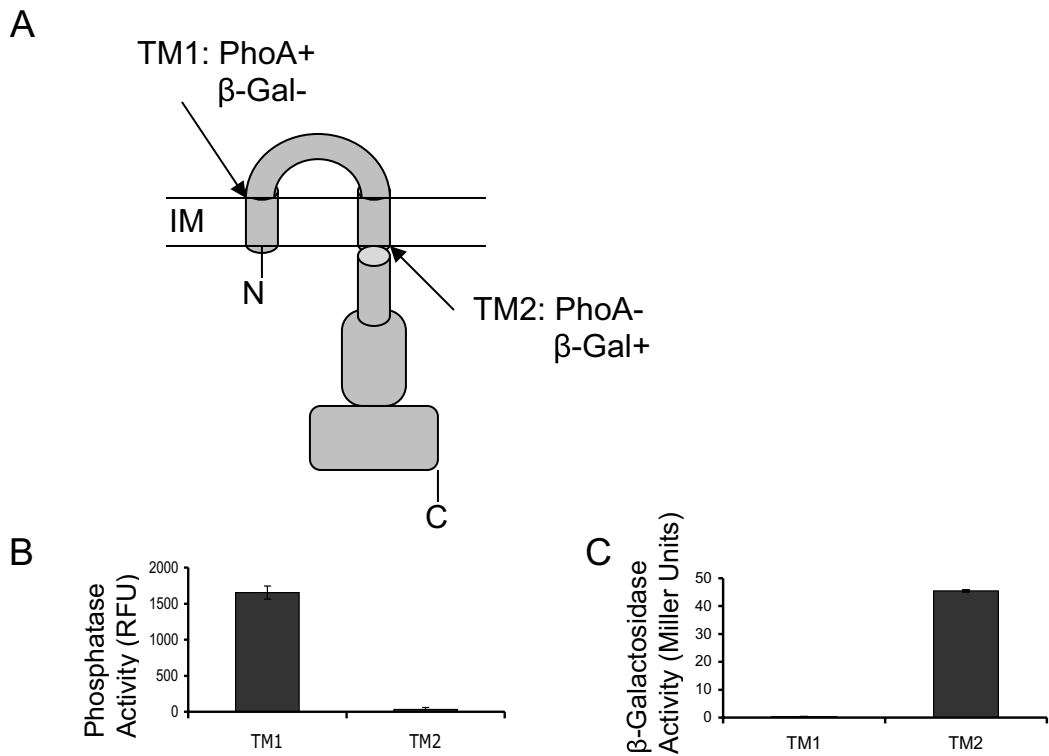

**Fig. S4.** Testing the predicted topology of LapD in the inner membrane. (A) A schematic of LapD shows the location of and activity of fusions (TM1 and TM2, respectively, indicated by arrows). (B) Phosphate activity of PhxA fusions to TM1 and TM2 expressed in relative fluorescence units (RFU). Fusion of PhxA to TM1 results in enzymatic activity, but fusion to TM2 does not, suggesting that residues between TM1 and TM2 are periplasmic and residues after TM2 are cytoplasmic. (C) β-Galactosidase activity of fusions to TM1 and TM2, in Miller units. Only fusion of β-galactosidase to TM2 results in enzymatic activity. This finding suggests a cytoplasmic localization of residues after TM2, consistent with the PhxA fusion data.

**Table S1. LapD stability in vivo**

| Allele       | Phenotype <sup>a</sup>         | Stability <sup>b</sup> |
|--------------|--------------------------------|------------------------|
| LapD         | WT biofilm                     | 100                    |
| K446A        | no biofilm                     | 92.9                   |
| R450A        | no biofilm                     | 93.8                   |
| K581A        | no biofilm                     | 98.7                   |
| E617A        | no biofilm                     | 105                    |
| E203K        | biofilm reduced                | 90.9                   |
| E203D        | WT biofilm                     | 103                    |
| ΔH1          | hyperbiofilm                   | 156                    |
| ΔH2          | hyperbiofilm                   | 52.3                   |
| ΔHAMP        | hyperbiofilm                   | 23.8                   |
| ΔH1, R450A   | hyperbiofilm                   | 92.9                   |
| pNterm       | WT biofilm upon overexpression | undetectable           |
| pNterm-βgal  | hyperbiofilm                   | 120                    |
| pCytoplasmic | no biofilm                     | 73.2                   |
| pEAL         | no biofilm                     | 95.8                   |
| L152P        | biofilm reduced                | 84.1                   |
| L152P, ΔH1   | biofilm reduced                | 97.7                   |

<sup>a</sup>Phenotype indicates the ability of the allele to complement the  $\Delta$  *lapD* mutant for biofilm formation, relative to the WT allele.

<sup>b</sup>Stability is given as percent abundance relative to WT LapD, calculated by densitometry using scanned images of representative western blots.

Table S2. Bacterial strains and plasmids

| Strain or Plasmid                        | Genotype or Description                                                               | Reference                      |
|------------------------------------------|---------------------------------------------------------------------------------------|--------------------------------|
| <i>Escherichia coli</i>                  |                                                                                       |                                |
| Top-10                                   | Relevant characteristics: <i>recA1 araD139</i> Δ ( <i>ara-leu</i> )7697               | Invitrogen                     |
| S17-1(λpir)                              | <i>thi pro hsdR- hsdM+</i> Δ <i>recA</i> RP4-2::TcMu-Km::Tn7                          | (Simon <i>et al.</i> , 1983)   |
| <i>Pseudomonas fluorescens</i>           |                                                                                       |                                |
| Pf0-1                                    | Wild type                                                                             | (Compeau <i>et al.</i> , 1988) |
| Δ <i>lapD</i>                            | Pf0-1 with unmarked deletion of <i>lapD</i>                                           | This study                     |
| PF-013                                   | Pf0-1 expressing <i>lapA</i> -HA                                                      | (Monds <i>et al.</i> , 2007)   |
| PFN-001                                  | Δ <i>lapD</i> expressing <i>lapA</i> -HA                                              | This study                     |
| Δ <i>pst</i>                             | Pf0-1 with deletion of <i>pstSCAB-phoU</i> ; Gm(r)                                    | (Monds <i>et al.</i> , 2006)   |
| Δ <i>pst</i> Δ <i>rapA</i>               | Δ <i>pst</i> with unmarked deletion of <i>rapA</i> ; Gm(r)                            | (Monds <i>et al.</i> , 2007)   |
| Δ <i>pst</i> Δ <i>rapA</i> , <i>lapD</i> | Δ <i>pst</i> Δ <i>rapA</i> ::pUC- <i>lapD</i> ; Km(r)                                 | This study                     |
| <i>pst</i>                               | Pf0-1::pKO- <i>pstC</i> ; Tc(r)                                                       | This study                     |
| Δ <i>lapD</i> , <i>pst</i>               | Δ <i>lapD</i> ::pKO- <i>pstC</i> ; Tc(r)                                              | This study                     |
| Δ <i>rapA lapD</i> pLapD                 | Δ <i>rapA</i> ::pUC- <i>lapD</i> ; pLapD Km(r) Gm(r)                                  | This study                     |
| Δ <i>lapD</i> Tn7 Plac- <i>rapA</i>      | Δ <i>lapD</i> with with <i>lacI</i> -Plac- <i>rapA</i> integrated at the Tn7 site     | This study                     |
| Δ <i>lapD</i> Tn7 vector                 | Δ <i>lapD</i> with the HRB2 vector at the Tn7 site                                    | This study                     |
| Δ <i>lapD</i> :: <i>lapD</i>             | Δ <i>lapD</i> with the <i>lapD</i> gene integrated into the native locus via pDN2     | This study                     |
| Δ <i>lapD</i> ::K446A                    | Δ <i>lapD</i> :: <i>lapD</i> with the K446A allele of <i>lapD</i> at the native locus | This study                     |
| Δ <i>lapD</i> ::E203K                    | Δ <i>lapD</i> :: <i>lapD</i> with the E203K allele of <i>lapD</i> at the native locus | This study                     |
| <i>lapB</i>                              | Pf0-1::pMQ89- <i>lapB</i> . Cannot secrete LapA due to loss of transporter            | (Monds <i>et al.</i> , 2007)   |
| Plasmids                                 |                                                                                       |                                |
| p72                                      | pMQ72                                                                                 | (Shanks <i>et al.</i> , 2006)  |
| pLapD                                    | pMQ72 expressing <i>lapD</i>                                                          | This study                     |
| pLapD6H                                  | pLapD with the addition of six histidine codons to <i>lapD</i>                        | This study                     |
| pΔ GGDEF                                 | pLapD6H with deletion of codons for R247-A387 of LapD                                 | This study                     |
| pΔ EAL                                   | pLapD6H with deletion of codons for H412-G649 of LapD                                 | This study                     |
| pEAL                                     | pLapD6H with deletion of codons for S2-G391 of LapD                                   | This study                     |
| pK446A                                   | pLapD6H with point mutation K446A in LapD                                             | This study                     |
| pR450A                                   | pLapD6H with point mutation R450A in LapD                                             | This study                     |
| pK581A                                   | pLapD6H with point mutation K581A in LapD                                             | This study                     |
| pE617A                                   | pLapD6H with point mutation E617A in LapD                                             | This study                     |
| pΔ H1                                    | pLapD6H with deletion of codons for M180-A186 of LapD                                 | This study                     |
| pΔ H2                                    | pLapD6H with deletion of codons for V207-Q213 of LapD                                 | This study                     |
| pΔ HAMP                                  | pLapD6H with deletion of codons for P176-Q223 of LapD                                 | This study                     |
| pΔ H1-R450A                              | pΔ H1 with point mutation R450A in LapD                                               | This study                     |
| pE203K                                   | pLapD6H with point mutation E203K in LapD                                             | This study                     |
| pE203D                                   | pLapD6H with point mutation E203D in LapD                                             | This study                     |
| pL152P                                   | pLapD6H with point mutation L152P in LapD                                             | This study                     |
| pΔ H1-L152P                              | pΔ H1 with point mutation R450A in LapD                                               | This study                     |
| pNterm                                   | pMQ72 expressing the first 153 codons of LapD                                         | This study                     |
| pNterm+βgal                              | pLapD6H with replacement of codons P176-G649 with <i>lacZ</i>                         | This study                     |
| pCyttoplasmic                            | pMQ72 expressing P176-H655 of <i>lapD</i> 6H plus an N-term M codon                   | This study                     |
| pMQ83                                    | <i>sacB tetR ColE1 lacZalpha oriT CEN4 ARSH6 URA3</i>                                 | (Shanks <i>et al.</i> , 2006)  |
| pLapDKO                                  | pMQ83 based allelic exchange construct for deletion of <i>lapD</i>                    | This study                     |
| pKO3                                     | <i>Pseudomonas</i> integration vector; MCS, <i>oriT</i> , <i>lacZ'</i> , Tc(r)        | (Monds <i>et al.</i> , 2006)   |
| pKO- <i>pstC</i>                         | Integration construct for insertional inactivation of <i>pstC</i>                     | This study                     |
| pLapD-TM1-Bgal                           | pLapD6H with replacement of codons R31-G649 with <i>lacZ</i>                          | This study                     |
| pLapD-TM1-PhoA                           | pLapD6H with replacement of codons R31-G649 with <i>phoA</i>                          | This study                     |
| pLapD-TM2-PhoA                           | pLapD6H with replacement of codons P176-G649 with <i>phoA</i>                         | This study                     |
| pHRB2                                    | Vector containing Km marked Tn7 construct                                             | (Monds <i>et al.</i> , 2007)   |
| pSRKKm                                   | pBBR based vector with tightly controlled <i>lacI</i> -Plac                           | (Khan <i>et al.</i> , 2008)    |
| pSRK- <i>rapA</i>                        | pSRK with <i>rapA</i> cloned downstream of Plac (via HindIII and XhoI)                | This study                     |
| pHRB2-SRK- <i>rapA</i>                   | pHRB2 with <i>lacI</i> -Plac- <i>rapA</i> inside Tn7                                  | This study                     |
| pPA1107                                  | pMQ72 expressing PA1107 of <i>Pseudomonas aeruginosa</i> PA14                         | This study                     |
| pDN2                                     | pMQ87 based vector with a Kan(r) in place of Gm (r)                                   | This study                     |
| pDN2- <i>lapD</i>                        | pDN2 with <i>lapD</i> and 756bp of upstream genomic sequence                          | This study                     |
| pDN2-K446A                               | pDN2- <i>lapD</i> with the K446A mutation                                             | This study                     |
| pDN2-E203K                               | pDN2- <i>lapD</i> with the E203K mutation                                             | This study                     |
